# Supplementary material
Source: HighWire-hosted journal article supplement (http://ajnr-stage2.highwire.org/highwire/filestream/59029/field_highwire_adjunct_files/0/17-00543.pdf)
Supplement: 17-00543.pdf [file 17-00543.pdf]

## ON-LINE APPENDIX: EXPANDED METHODS AND RESULTS

### **Accuracy of Volume Pulsation Quantification**

In this Appendix, we further explain in detail how we studied the accuracy of the volume pulsation quantification analysis. The workflow is graphically supported by the flowchart in On-line Fig 1.

### **The Effect of Contrast-to-Noise Ratio and Signal Intensity Fluctuations on the Accuracy of the Pulsation Analysis and the Interaction with Aneurysm Size**

In images with low CNR, the difference in intensity between the aneurysm and the background can be small. When one uses a signal intensity–based segmentation method, the aneurysm volumes in these low CNR images could be overestimated. These artifactual volume changes resulting from signal fluctuations and low CNR are due to a change in the detection of the border and thus depend on the size of the aneurysm or object.

Some systematic signal fluctuations over the heartbeat that are intrinsic to the acquisition method cannot be excluded, though these fluctuations were minimized using cardiac gating in the TFE sequence, which means that the signal was maintained in steady-state while waiting for the next electrocardiogram R wave. Such signal fluctuations could be interpreted as a volume change by our segmentation method.

To study the effect of CNR and signal intensity fluctuations on the accuracy of the pulsation analysis, we simulated a spheric static digital phantom in Matlab R2013b (MathWorks, Natick, Massachusetts). A graphical user interface was built to perform image analysis similar to the segmentation method used in the patient study (Analyze). The ROI for segmentation of the phantom volume was standardized at twice the size of the phantom, and the signal intensity threshold for segmentation was chosen manually. To avoid the need for manual corrections of falsely included or excluded voxels after segmentation, we added a connected component analysis and a filling process to the image analysis. Using connected component analysis, we preserved the largest area of connected voxels in the image while discarding all other single voxels. In the filling process, excluded pixels in the lumen of the phantom were automatically filled.

### **Contrast-to-Noise Ratio**

To address the inaccuracy due to noise, we created images with decreasing contrast-to-noise ratios. A static phantom with a diameter of 14 mm (volume =  $1500 \text{ mm}^3$ ) was used, and noise was added using the Rice distribution to simulate MR imaging characteristic noise.<sup>1</sup> Various amounts of noise were added to let the SNR of the phantom range in 15 steps between approximately 3 and 40.

Absolute (in cubic millimeters) and relative volume pulsations were measured in the static phantoms in which CNR was varied, further referred to as the “estimated inaccuracy of the volume pulsation analysis.”

The results of this analysis showed that the effect of CNR on the estimated inaccuracy increases quickly below a CNR of approximately 6 (On-line Fig 2).

### **Interaction of the Contrast-to-Noise Ratio with Aneurysm Size (Phantom Volume) and Its Effect on the Accuracy of the Pulsation Analysis**

The interaction of noise with the volume of the static phantom was analyzed for 3 different CNRs: high (CNR $\approx$ 12), medium (CNR $\approx$ 4), and low (CNR $\approx$ 2) CNR. Eleven static phantoms with increasing volumes (range, 12– $1500 \text{ mm}^3$ ) were used to study the interaction of CNR and aneurysm size (phantom volume). In these phantoms, the absolute (in cubic millimeters) and relative volume pulsation was measured. The results of this analysis showed that in high-CNR images, the image analysis performs flawlessly and independent of phantom size (On-line Fig 3). In the phantoms with medium CNR, the estimated inaccuracy was small. The absolute estimated inaccuracy linearly increased with increasing phantom size (On-line Fig 3A). When one analyzed the relative influence, a steep increase in estimated inaccuracy with decreasing phantom size was seen (On-line Fig 3B). Similar results were found in the phantom with low CNR but with considerably larger absolute and relative inaccuracies (On-line Fig 3).

### **Signal Intensity Fluctuations**

To address the inaccuracy due to signal intensity fluctuations, we multiplied the static basic phantom intensity with a sine to create a sinusoidal intensity fluctuation throughout the 15 time phases. The magnitude of the sine varied between 0% and 10% of the mean intensity of the phantom. In this analysis, the CNR level was kept high, with a mean CNR of 12. To simulate the MR images and the inflow effect of blood realistically, we introduced a partial volume effect to the phantom images. First, a high-resolution phantom with 0.05-mm isotropic resolution (ie, each voxel in the final phantom image contained  $11 \times 11 \times 11$  voxels in the high-resolution phantom) was rendered. Using fast Fourier transform, we converted this high-resolution phantom from the spatial to the frequency domain ( $k$ -space). The  $k$ -space was cropped back to the original resolution. Subsequently, the cropped  $k$ -space was transformed back to the spatial domain using the inverse fast Fourier transform (On-line Fig 4). Finally, noise was added to the image, and image analysis was performed.

Absolute (in cubic millimeters) and relative volume pulsations were measured in the static phantoms in which signal intensity was varied, further referred to as the estimated inaccuracy of the volume pulsation analysis. The results of this analysis showed that estimated inaccuracy increased with increasing intensity fluctuation (On-line Fig 5).

### **Interaction of Signal Intensity Fluctuations with Aneurysm Size (Phantom Volume) and Its Effect on the Accuracy of the Pulsation Analysis**

The interaction of phantom volume with the inaccuracy due to intensity fluctuations was also analyzed. This analysis was performed on the static phantom with 3 different sizes (large, volume =  $1500 \text{ mm}^3$ ; medium, volume =  $460 \text{ mm}^3$ ; and small, volume of  $12 \text{ mm}^3$ ).

The results of the analysis of the interaction of size with intensity fluctuations are shown in On-line Fig 5. The larger the phantom volume, the larger was the absolute pulsation in the phantom (in cubic millimeters, On-line Fig 5A). However, when one looked at

relative pulsation, small phantoms had a relatively larger inaccuracy than the larger phantoms (On-line Fig 5B).

### Estimation of Aneurysm-Specific Inaccuracy

As shown with the phantom measurements, both signal intensity fluctuations and CNR play a role in the inaccuracy of the measurement of actual aneurysm pulsation, and this inaccuracy depends on the size of the phantom. To estimate the inaccuracy of each of the pulsation measurements in the patient study in Stages I and II, we performed an additional phantom experiment.

Patient-specific pulsating phantoms were created using an optimized version of the graphical user interface built to create static phantoms in Matlab (described above). The phantoms are spheres in a 4D space of  $320 \times 320 \times 15 \times 25$  (respectively, the x-coordinates, y-coordinates, cardiac phases, and slices). Volume pulsation was added to the phantoms with a linear increase and decrease of the volume with a maximum volume at the eighth cardiac phase. The amount of volume pulsation applied was copied from the actual volume pulsation measured in each of the aneurysms with Analyze. For the aneurysms in Stage II, we used the aneurysm volumes from the primary analysis in Analyze of the improved TFE sequence after contrast enhancement as input for the pulsating phantoms because we assumed that the pulsation quantification on the images after contrast enhancement was the most accurate.

The CNR of each of the aneurysms in our study was determined using the equation included in the Methods section of the article using an ROI in the lumen of the aneurysm and an ROI in the background close to the aneurysm. The SD of the noise was estimated as the SD of the signal of the ROI over the cardiac cycle. This estimation will probably lead to a slightly higher noise level than actually present. Intensity fluctuations in the patient data were estimated at the edge of the aneurysms. First, an ROI (red area in On-line Fig 6) was encoded by eroding all slices in the 3D volume segmentations of the patient data (provided by Analyze) with a flat, disk-shaped structuring element with a radius of 2 voxels, resulting in an eroded ROI. By subtracting the eroded ROI from the segmentation, we determined the edge of the aneurysm (shown in green in On-line Fig 6). The intensity fluctuation ( $\Delta I$ ) was calculated by

$$\Delta I = \frac{[|I(t) - I_p|]_{\text{max}}}{I_{\mu}},$$

where  $t$  represents the cardiac phases;  $I(t)$ , the mean pixel value in the edge of the ROI for phase  $t$ ; and  $I_{\mu}$ , the mean pixel value over all the cardiac phases. The measured intensity fluctuations were applied to the phantoms in a sinusoidal shape, where the measured fluctuation represents the amplitude of that sinus.

The volume pulsation of the pulsating phantom was determined with a signal intensity-based threshold to automatically segment the phantom volume (comparable with the analysis in Analyze but performed in Matlab, as described above). The difference between the volume pulsation input and the volume pulsation output of the phantoms was called the absolute observed artifactual pulsation. The magnitude of the absolute observed artifactual pulsation shows the inaccuracy of the pulsation analysis.

The results of the pulsating phantom analysis of the aneurysms in Stage I of the study show that in all except 2 aneurysms, the imaging analysis overestimated the volume pulsation (On-line Table 2). In

Stage II, in all phantoms, the imaging analysis overestimated the volume pulsation (On-line Table 3).

### Effect of the Flow Displacement Artifacts on the Accuracy of the Pulsation Analysis

The flow displacement artifacts are another important determinant of the accuracy of the volume pulsation measurement in the patient data. These artifacts are induced by flow in the phase-encoding direction between the time of phase encoding (directly after excitation) and frequency encoding (at  $t = TE$ ), which causes misregistration. The effect of the flow displacement artifacts on the volume pulsation quantification was estimated from the 3D phase-contrast MR imaging flow velocity data that were available for 6 of the 10 aneurysms included in the current study (Stage I). Briefly, we used the following scan parameters: FOV =  $190 \times 190 \times 20 \text{ mm}^3$  (anterior to posterior  $\times$  right to left  $\times$  foot to head), acquired resolution =  $0.5 \times 0.5 \times 0.5 \text{ mm}^3$ , TR/TE = 8.5/7.1 ms, flip angle =  $20^\circ$ . A velocity-encoding of 150 cm/s in all directions was used. We obtained 6 cardiac phases, retrospectively gated, using a peripheral pulse unit. The total scan duration was about 13 minutes, depending on the heart rate.

The magnitude of the phase-contrast MR imaging data of a single heart phase was used as a mimic of the aneurysm as seen in the TFE sequence. Subsequently, the following formula was used to calculate the flow displacement artifacts that would be present in the TFE sequence for each voxel of the aneurysm:

$$\Delta y_v = v_y(T_E - t_{pe})$$

where  $\Delta y_v$  represents the artifactual displacement in the phase-encoding direction in a voxel,  $v_y$  is the blood velocity in the phase direction,  $T_E$  is the echo time (4.4 ms for the TFE sequence), and  $t_{pe}$  is the time of phase-encoding (1.6 ms for the TFE sequence, obtained by inspecting the graphical sequence viewer supplied by the MR imaging vendor).

The calculated displacement artifacts were applied to the magnitude of the phase-contrast MR imaging data to simulate the flow-displacement artifacts of the TFE sequence. Because the TFE sequence can be planned in any orientation with respect to the blood flow in the aneurysm, the phase-encoding direction (in which the displacement artifacts occur) was simulated in 3 orthogonal directions, yielding 3 separate estimations of the potential flow-displacement artifacts. Before we applied the displacement to the voxels of the phase-contrast MR imaging magnitude image, this image was interpolated by a factor of 1000 in the simulated phase-encoding direction to allow subvoxel shifts. Minimum aneurysm volume, maximum aneurysm volume, and the pulsation resulting from the flow-displacement artifacts were calculated for all available aneurysms and for the 3 different simulated orientations of the TFE sequence planning.

In 5 of the 6 aneurysms, the pulsation observed because of the flow-displacement artifacts was of the same magnitude or higher compared with the actual pulsation measured in the 6 available patient datasets in at least 1 angulation (On-line Table 5).

### REFERENCE

- Henkelman RM. Measurement of signal intensities in the presence of noise in MR images. *Med Phys* 1985;12:232–33 CrossRef Medline

**On-line Table 1: Baseline characteristics and pulsation of the 10 unruptured intracranial aneurysms in Stage I**

| Aneurysm No. | Aneurysm Size, Largest Diameter (Height × Width) (mm) | Age (yr), Sex      | Aneurysm Location | Imaging Sequence | Minimum Volume (mm <sup>3</sup> ) | Moment of Minimum Volume in the Cardiac Cycle (% of Cardiac Cycle) | Maximum Volume (mm <sup>3</sup> ) | Moment of Maximum Volume in the Cardiac Cycle (% of Cardiac Cycle) | Relative Volume Pulsation (%) | Absolute Volume Pulsation (mm <sup>3</sup> ) | Absolute Observed Pulsation (mm <sup>3</sup> ) <sup>a</sup> |
|--------------|-------------------------------------------------------|--------------------|-------------------|------------------|-----------------------------------|--------------------------------------------------------------------|-----------------------------------|--------------------------------------------------------------------|-------------------------------|----------------------------------------------|-------------------------------------------------------------|
| 1            | 2.8 (1.8 × 1.6)                                       | 56, F              | Pericallosal      | TFE              | 12                                | 93                                                                 | 15                                | 20                                                                 | 25                            | 3                                            | 1.3                                                         |
| 2            | 5.6 (4.5 × 3.9)                                       | 60, F <sup>b</sup> | Pericallosal      | TFE              | 70                                | 93                                                                 | 75                                | 53                                                                 | 7                             | 5                                            | 1.9                                                         |
| 3            | 6.1 (6.1 × 5.7)                                       | 74, F              | AcomA             | TFE              | 92                                | 100                                                                | 98                                | 53                                                                 | 7                             | 6                                            | 3.1                                                         |
| 4            | 6.8 (6.0 × 4.7)                                       | 60, F <sup>b</sup> | MCA               | TFE              | 56                                | 40                                                                 | 64                                | 13                                                                 | 14                            | 8                                            | 0.7                                                         |
| 5            | 8.7 (6.1 × 7.7)                                       | 72, F              | PICA              | TFE              | 308                               | 7                                                                  | 327                               | 73                                                                 | 6                             | 19                                           | −0.2                                                        |
| 6            | 9.3 (6.6 × 8.2)                                       | 56, F              | AcomA             | TFE              | 292                               | 100                                                                | 303                               | 20                                                                 | 4                             | 11                                           | 1.1                                                         |
| 7            | 9.6 (6.1 × 9.6)                                       | 55, M              | MCA               | TFE              | 285                               | 40                                                                 | 298                               | 73                                                                 | 5                             | 13                                           | 5.4                                                         |
| 8            | 10.1 (8.8 × 7.7)                                      | 64, M              | MCA               | TFE              | 276                               | 53                                                                 | 298                               | 13                                                                 | 8                             | 22                                           | −0.4                                                        |
| 9            | 12.9 (12.9 × 6.3)                                     | 50, F              | MCA               | TFE              | 312                               | 13                                                                 | 324                               | 27                                                                 | 4                             | 12                                           | 2.6                                                         |
| 10           | 18.6 (14 × 15.8)                                      | 53, F              | Basilar           | TFE              | 2078                              | 47                                                                 | 2128                              | 100                                                                | 2                             | 50                                           | 3.5                                                         |

**Note:**—AcomA indicates anterior communicating artery.

<sup>a</sup> The absolute observed artifactual pulsation is the difference between the absolute volume pulsation and the volume pulsation of the aneurysm-specific digital phantom and is a measure for the inaccuracy of the volume pulsation analysis (see On-line Appendix for further details).

<sup>b</sup> Two aneurysms in 1 patient.

**On-line Table 2: Results of the volume pulsation quantification in pulsating phantoms<sup>a</sup>**

| Phantom | Phantom Input |                              |                                     |                                     |                                           | Phantom Output                      |                                     |                                           | Absolute Observed<br>Artifactual Pulsation<br>(mm <sup>3</sup> ) |
|---------|---------------|------------------------------|-------------------------------------|-------------------------------------|-------------------------------------------|-------------------------------------|-------------------------------------|-------------------------------------------|------------------------------------------------------------------|
|         | CNR           | Intensity<br>Fluctuation (%) | Min<br>Volume<br>(mm <sup>3</sup> ) | Max<br>Volume<br>(mm <sup>3</sup> ) | Volume<br>Pulsation<br>(mm <sup>3</sup> ) | Min<br>Volume<br>(mm <sup>3</sup> ) | Max<br>Volume<br>(mm <sup>3</sup> ) | Volume<br>Pulsation<br>(mm <sup>3</sup> ) |                                                                  |
| 1       | 8             | 5.7                          | 12                                  | 15                                  | 3                                         | 12.1                                | 16.3                                | 4.3                                       | 1.3                                                              |
| 2       | 6             | 2.4                          | 70                                  | 75                                  | 5                                         | 70.0                                | 76.9                                | 6.9                                       | 1.9                                                              |
| 3       | 5             | 3.2                          | 92                                  | 98                                  | 6                                         | 87.8                                | 96.9                                | 9.1                                       | 3.1                                                              |
| 4       | 3             | 2.9                          | 56                                  | 64                                  | 8                                         | 47.1                                | 55.8                                | 8.7                                       | 0.7                                                              |
| 5       | 7             | 1.8                          | 308                                 | 327                                 | 19                                        | 307.7                               | 326.9                               | 19.2                                      | −0.2                                                             |
| 6       | 6             | 2.1                          | 292                                 | 303                                 | 11                                        | 292.4                               | 302.3                               | 9.9                                       | 1.1                                                              |
| 7       | 3             | 6.7                          | 285                                 | 298                                 | 13                                        | 276.6                               | 295.0                               | 18.4                                      | 5.4                                                              |
| 8       | 1             | 2.7                          | 276                                 | 298                                 | 22                                        | 276.1                               | 297.7                               | 21.6                                      | −0.4                                                             |
| 9       | 8             | 2.2                          | 312                                 | 324                                 | 12                                        | 312.8                               | 327.3                               | 14.6                                      | 2.6                                                              |
| 10      | 3             | 2.2                          | 2078                                | 2128                                | 50                                        | 1987.8                              | 2034.3                              | 46.5                                      | 3.5                                                              |

**Note:**—Max indicates maximum; min, minimum.

<sup>a</sup> Phantom numbers correspond with the patients in the Table. The phantom input is the patient data obtained in Stage I of the study. CNR and intensity fluctuations were measured in the patient data and applied to the phantom. The phantom output is the result of the volume analysis of the pulsating phantom (mean of 2 times the analysis in Matlab).

**On-line Table 3: Pulsation observed as result of the simulated flow displacement artifacts for 3 different orientations of the acquisition of the TFE sequence (phase-encoding of the TFE sequence parallel to the x, y, or z direction of the phase-contrast MRI dataset, respectively)**

| Orientation/Pulsation                            | Aneurysm 1 | Aneurysm 2 | Aneurysm 3 | Aneurysm 4 | Aneurysm 5 | Aneurysm 6 |
|--------------------------------------------------|------------|------------|------------|------------|------------|------------|
| (1,0,0)                                          |            |            |            |            |            |            |
| V <sub>min</sub> (art in mm <sup>3</sup> )       | 141.4      | 212.6      | 174.4      | 506.0      | 731.2      | 596.5      |
| V <sub>max</sub> (art in mm <sup>3</sup> )       | 148.7      | 231.8      | 176.4      | 509.7      | 739.1      | 610.0      |
| V <sub>pulsation</sub> (art in mm <sup>3</sup> ) | 7.3        | 19.2       | 1.9        | 3.7        | 7.9        | 13.5       |
| (0,1,0)                                          |            |            |            |            |            |            |
| V <sub>min</sub> (art in mm <sup>3</sup> )       | 133.9      | 183.0      | 179.6      | 508.6      | 729.4      | 591.9      |
| V <sub>max</sub> (art in mm <sup>3</sup> )       | 139.6      | 198.8      | 187.7      | 511.2      | 736.1      | 602.6      |
| V <sub>pulsation</sub> (art in mm <sup>3</sup> ) | 5.7        | 15.8       | 8.1        | 2.7        | 6.8        | 10.7       |
| (0,0,1)                                          |            |            |            |            |            |            |
| V <sub>min</sub> (art in mm <sup>3</sup> )       | 138.1      | 182.4      | 179.6      | 495.1      | 720.7      | 588.7      |
| V <sub>max</sub> (art in mm <sup>3</sup> )       | 142.6      | 188.8      | 185.2      | 506.8      | 732.5      | 600.0      |
| V <sub>pulsation</sub> (art in mm <sup>3</sup> ) | 4.5        | 6.4        | 5.6        | 11.7       | 11.7       | 11.2       |
| Actual pulsation, aneurysm size <sup>a</sup>     |            |            |            |            |            |            |
| Aneurysm size (mm)                               | 5.6        | 6.1        | 6.8        | 9.6        | 10.1       | 12.9       |
| V <sub>min</sub> (mm <sup>3</sup> )              | 136.9      | 193.8      | 182.1      | 506.5      | 733.5      | 599.6      |
| V <sub>pulsation</sub> (mm <sup>3</sup> )        | 5          | 6          | 8          | 13         | 22         | 12         |

**Note:**—art indicates artifacts; V<sub>max</sub>, maximum aneurysm volume; V<sub>min</sub>, minimum aneurysm volume; V<sub>pulsation</sub>, pulsation volume.

<sup>a</sup> The actual pulsation as measured in the patient data (Stage I) and the aneurysm size.

**On-line Table 4: Baseline characteristics and pulsation of the 9 unruptured intracranial aneurysms in Stage II**

| Aneurysm No. | Aneurysm Size, Largest Diameter (Height × Width) (mm) | Age (yr), Sex | Aneurysm Location | Imaging Sequence | Minimum Volume (mm <sup>3</sup> ) | Moment of Minimum Volume in the Cardiac Cycle (% of Cardiac Cycle) | Maximum Volume (mm <sup>3</sup> ) | Moment of Maximum Volume in the Cardiac Cycle (% of Cardiac Cycle) | Relative Volume Pulsation (%) | Absolute Volume Pulsation (mm <sup>3</sup> ) | Absolute Observed Pulsation (mm <sup>3</sup> ) <sup>a</sup> |
|--------------|-------------------------------------------------------|---------------|-------------------|------------------|-----------------------------------|--------------------------------------------------------------------|-----------------------------------|--------------------------------------------------------------------|-------------------------------|----------------------------------------------|-------------------------------------------------------------|
| 11           | 2 (2 × 1.6)                                           | 53, F         | MCA               | TFEi             | 3                                 | 22                                                                 | 4                                 | 6                                                                  | 73%                           | 2                                            | —                                                           |
|              |                                                       |               |                   | CE TFEi          | 2                                 | 22                                                                 | 3                                 | 94                                                                 | 36%                           | 1                                            | 2                                                           |
| 12           | 6.2 (5.1 × 3.3)                                       | 58, F         | MCA               | TFEi             | 68                                | 28                                                                 | 90                                | 6                                                                  | 31%                           | 21                                           | —                                                           |
|              |                                                       |               |                   | CE TFEi          | 96                                | 33                                                                 | 104                               | 6                                                                  | 8%                            | 8                                            | 1                                                           |
| 13           | 5.4 (4.8 × 4.4)                                       | 70, M         | Acoma             | TFEi             | 44                                | 78                                                                 | 75                                | 100                                                                | 70%                           | 31                                           | —                                                           |
|              |                                                       |               |                   | CE TFEi          | 78                                | 78                                                                 | 96                                | 100                                                                | 23%                           | 18                                           | 13                                                          |
| 14           | 5.7 (5.7 × 3.1)                                       | 47, F         | MCA               | TFEi             | 62                                | 28                                                                 | 79                                | 94                                                                 | 28%                           | 17                                           | —                                                           |
|              |                                                       |               |                   | CE TFEi          | 70                                | 22                                                                 | 78                                | 89                                                                 | 11%                           | 8                                            | 9                                                           |
| 15           | 8.7 (8.1 × 6)                                         | 39, M         | MCA               | TFEi             | 134                               | 83                                                                 | 153                               | 17                                                                 | 14%                           | 19                                           | —                                                           |
|              |                                                       |               |                   | CE TFEi          | NA                                | NA                                                                 | NA                                | NA                                                                 | NA                            | NA                                           | NA                                                          |
| 16           | 8.7 (7.9 × 5.4)                                       | 70, M         | Acoma             | TFEi             | 91                                | 72                                                                 | 149                               | 94                                                                 | 64%                           | 58                                           | —                                                           |
|              |                                                       |               |                   | CE TFEi          | 114                               | 72                                                                 | 138                               | 100                                                                | 22%                           | 25                                           | 27                                                          |
| 17           | 9.4 (8.7 × 6.7)                                       | 53, M         | Acoma             | TFEi             | 188                               | 89                                                                 | 215                               | 11                                                                 | 14%                           | 27                                           | —                                                           |
|              |                                                       |               |                   | CE TFEi          | 256                               | 83                                                                 | 265                               | 100                                                                | 4%                            | 9                                            | 10                                                          |
| 18           | 12.3 (8.1 × 8)                                        | 70, M         | Acoma             | TFEi             | 206                               | 78                                                                 | 289                               | 94                                                                 | 41%                           | 84                                           | —                                                           |
|              |                                                       |               |                   | CE TFEi          | 166                               | 78                                                                 | 191                               | 94                                                                 | 15%                           | 25                                           | 24                                                          |
| 19           | 13.7 (10.9 × 8.7)                                     | 51, M         | Acoma             | TFEi             | 419                               | 22                                                                 | 507                               | 89                                                                 | 21%                           | 88                                           | —                                                           |
|              |                                                       |               |                   | CE TFEi          | 581                               | 22                                                                 | 603                               | 94                                                                 | 4%                            | 22                                           | 25                                                          |

**Note:**—NA indicates not applicable; TFEi, the improved version of the turbo field echo sequence to image pulsation used in Stage II; Acoma, anterior communicating artery; CE, contrast-enhanced.

<sup>a</sup> The absolute observed artifactual pulsation is the difference between the absolute volume pulsation and the volume pulsation of the aneurysm-specific digital phantom and is a measure for the inaccuracy of the volume pulsation analysis (see On-line Appendix for further details). Only the contrast-enhanced TFE data were used as input for the phantom experiment because we expected the contrast-enhanced TFE sequence to perform better than the improved TFE alone.

**On-line Table 5: The results of the volume pulsation quantification in pulsating phantoms of Stage II<sup>a</sup>**

| Phantom         | Phantom Input |                              |                                     |                                     |                                           | Phantom Output                      |                                     |                                           | Absolute Observed<br>Artifactual Pulsation<br>(mm <sup>3</sup> ) |
|-----------------|---------------|------------------------------|-------------------------------------|-------------------------------------|-------------------------------------------|-------------------------------------|-------------------------------------|-------------------------------------------|------------------------------------------------------------------|
|                 | CNR           | Intensity<br>Fluctuation (%) | Min<br>Volume<br>(mm <sup>3</sup> ) | Max<br>Volume<br>(mm <sup>3</sup> ) | Volume<br>Pulsation<br>(mm <sup>3</sup> ) | Min<br>Volume<br>(mm <sup>3</sup> ) | Max<br>Volume<br>(mm <sup>3</sup> ) | Volume<br>Pulsation<br>(mm <sup>3</sup> ) |                                                                  |
| 11              | 19            | 24                           | 2                                   | 3                                   | 1                                         | 2                                   | 4                                   | 2                                         | 1                                                                |
| 11 <sup>b</sup> | 44            | 22                           | 2                                   | 3                                   | 1                                         | 1                                   | 4                                   | 3                                         | 2                                                                |
| 12              | 29            | 20                           | 96                                  | 104                                 | 8                                         | 93                                  | 102                                 | 9                                         | 1                                                                |
| 12 <sup>b</sup> | 34            | 12                           | 96                                  | 104                                 | 8                                         | 96                                  | 105                                 | 9                                         | 1                                                                |
| 13              | 25            | 38                           | 78                                  | 96                                  | 18                                        | 77                                  | 108                                 | 32                                        | 14                                                               |
| 13 <sup>b</sup> | 19            | 24                           | 78                                  | 96                                  | 18                                        | 73                                  | 104                                 | 31                                        | 13                                                               |
| 14              | 18            | 22                           | 70                                  | 78                                  | 8                                         | 68                                  | 84                                  | 16                                        | 9                                                                |
| 14 <sup>b</sup> | 29            | 13                           | 70                                  | 78                                  | 8                                         | 68                                  | 85                                  | 17                                        | 9                                                                |
| 15              | —             | —                            | —                                   | —                                   | —                                         | —                                   | —                                   | —                                         | —                                                                |
| 15 <sup>b</sup> | —             | —                            | —                                   | —                                   | —                                         | —                                   | —                                   | —                                         | —                                                                |
| 16              | 39            | 30                           | 114                                 | 138                                 | 25                                        | 113                                 | 164                                 | 50                                        | 26                                                               |
| 16 <sup>b</sup> | 24            | 21                           | 114                                 | 138                                 | 25                                        | 113                                 | 164                                 | 51                                        | 27                                                               |
| 17              | 22            | 16                           | 256                                 | 265                                 | 9                                         | 263                                 | 283                                 | 21                                        | 12                                                               |
| 17 <sup>b</sup> | 23            | 10                           | 256                                 | 265                                 | 9                                         | 263                                 | 282                                 | 19                                        | 10                                                               |
| 18              | 19            | 18                           | 166                                 | 191                                 | 25                                        | 156                                 | 203                                 | 47                                        | 22                                                               |
| 18 <sup>b</sup> | 19            | 7.5                          | 166                                 | 191                                 | 25                                        | 155                                 | 204                                 | 49                                        | 24                                                               |
| 19              | 14            | 15                           | 581                                 | 603                                 | 22                                        | 593                                 | 637                                 | 44                                        | 22                                                               |
| 19 <sup>b</sup> | 28            | 8                            | 581                                 | 603                                 | 22                                        | 553                                 | 600                                 | 47                                        | 25                                                               |

**Note:**—Max indicates maximum; min, minimum.

<sup>a</sup> Phantom numbers correspond with the patients in On-line Table 1. The phantom input is the patient data obtained in Stage II of the study. The aneurysm volumes from the primary analysis in Analyze of the improved TFE sequence after contrast enhancement were used as input for the pulsating phantoms because we assumed that the pulsation quantification on the images after contrast-enhancement was the most accurate. CNR and intensity fluctuations were measured in the patient data and applied to the phantom. The phantom output is the result of the volume analysis of the pulsating phantom (mean of 2 times the analysis in Matlab).

<sup>b</sup> The phantom with the improved TFE sequence after contrast enhancement. In aneurysm 5, the image acquisition of the contrast-enhanced improved TFE failed; therefore, we were not able to perform a phantom analysis.

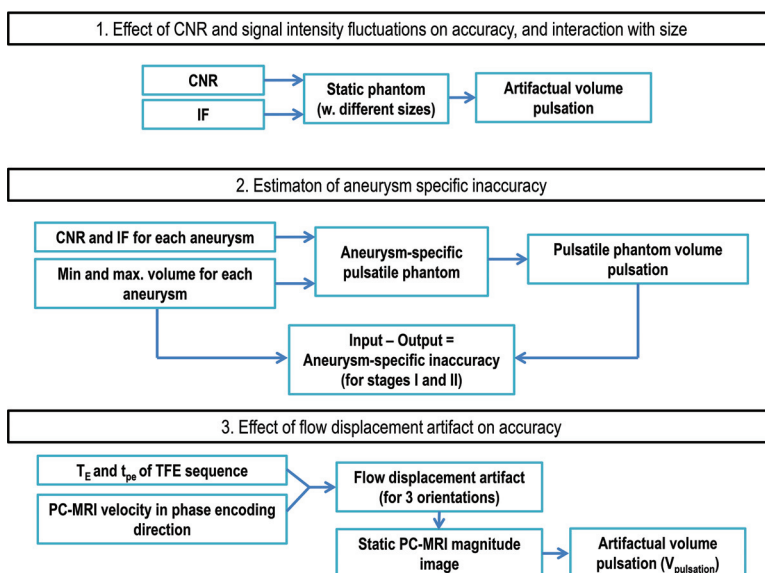

**ON-LINE FIG 1.** Schematic overview of the accuracy analysis of the volume pulsation quantification. IF indicates intensity fluctuation; min, minimum; max, maximum; PC-MRI, phase-contrast MR imaging; T<sub>E</sub>, echo time; T<sub>pe</sub>, time of phase-encoding; V<sub>pulsation</sub>, pulsation volume.

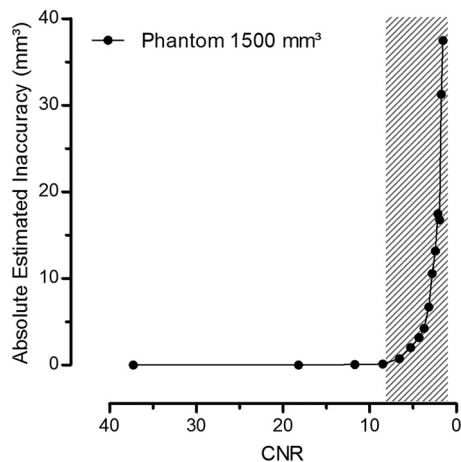

**ON-LINE FIG 2.** Estimated inaccuracy of the volume pulsation analysis as a function of the contrast-to-noise ratio. Measurement points indicate the decreasing CNR values as applied to the static phantom. The shaded area indicates the range of temporal CNRs measured in the patient scans of Stage I, indicate the range of CNR values that is relevant for interpreting the results of the patient study.

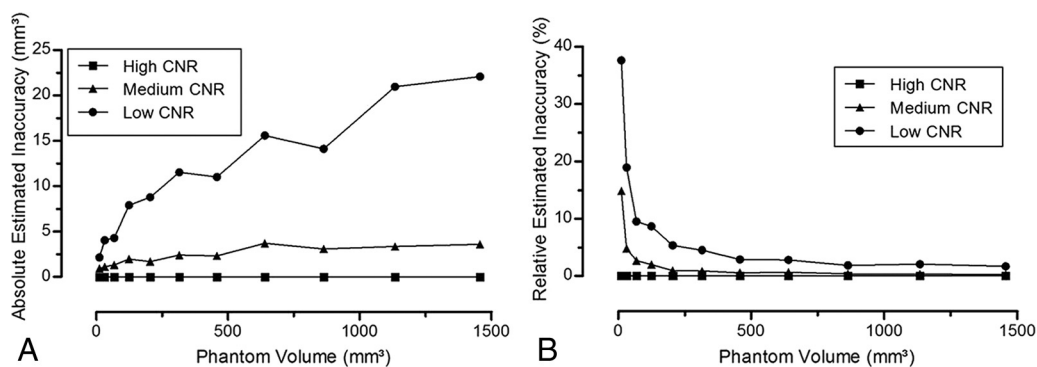

**ON-LINE FIG 3.** The interaction of the size of the phantom with the CNR on the estimated inaccuracy of the volume pulsation measurement. The estimated inaccuracy is plotted against phantom volume in the static phantoms for 3 discrete CNRs, namely high CNR (CNR $\approx$ 12), medium CNR (CNR $\approx$ 4), and low CNR (CNR $\approx$ 2). A, The influence of volume on the absolute estimated inaccuracy (cubic millimeters). B, Influence of volume on the relative estimated inaccuracy (percentage).

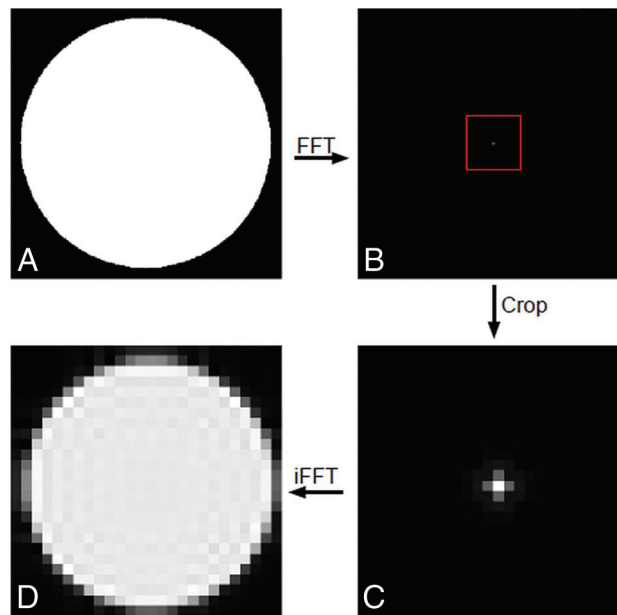

**ON-LINE FIG 4.** Simulation of the partial volume effect in the phantom. *A*, High-resolution phantom. *B*, Magnitude image of the frequency domain after applying the fast Fourier transform. The *red square* indicates the cropping area containing the low spatial frequencies. *C*, Magnitude image of the frequency domain cropped back to the correct resolution. *D*, Normal-resolution phantom shows a clear partial volume effect, after applying the inverse fast Fourier transform. FFT indicates fast Fourier transform; iFFT, inverse fast Fourier transform.

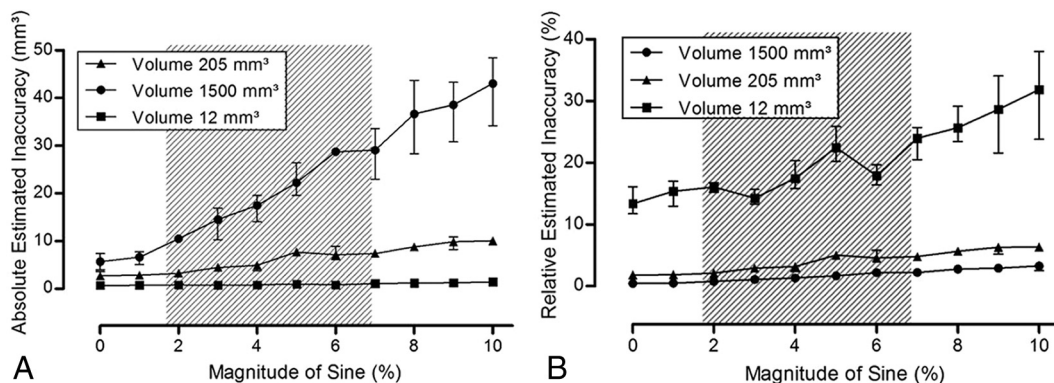

**ON-LINE FIG 5.** Estimated inaccuracy of the volume pulsation analysis as a function of the signal intensity fluctuations. The estimated inaccuracy of the analysis method was defined as the amount of observed pulsation in a static digital phantom: absolute estimated inaccuracy versus the magnitude of sinusoidal brightness fluctuation in percentages of the mean signal (*A*) and relative estimated inaccuracy (relative is obtained by normalizing to mean volume) versus the sinusoidal brightness fluctuation in a simulated high-quality scan ( $CNR \approx 12$ ) for 3 different phantom sizes (*B*). *Shaded area* indicates the range of brightness fluctuations measured in the patient scans in Stage I of the patient study, to indicate the range of signal intensity fluctuation values that is relevant for interpreting the results of the patient study.

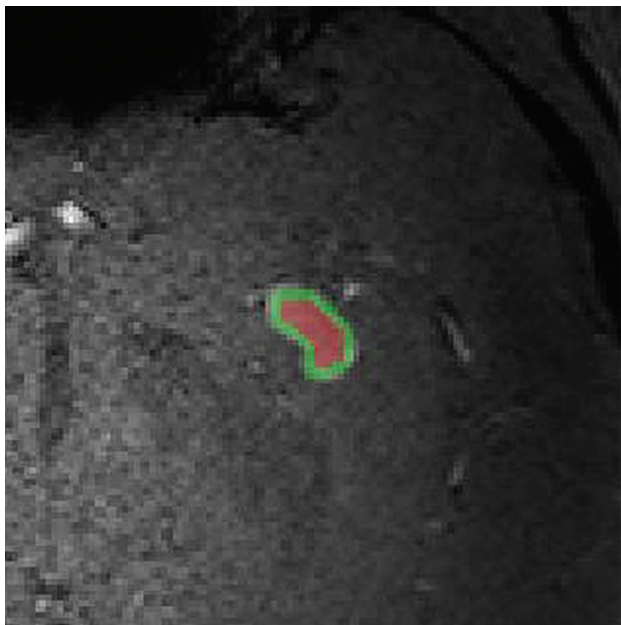

**ON-LINE FIG 6.** Intensity fluctuation measurement. A slice through a middle cerebral artery aneurysm with the eroded ROI in red and the residual edge of the aneurysm in green.
